# Supplementary material for: Preparation and Performance Evaluation of Slow-expanding Hydrophobic Polymer Nanomicrospheres
Source: Research Square preprint supplement (doi:10.21203/rs.3.rs-6885960/v1), 2025-07-04
Supplement: Supplementary file 1 [file 9f33d999205ca3823f90d360.pdf]

## Table of contents

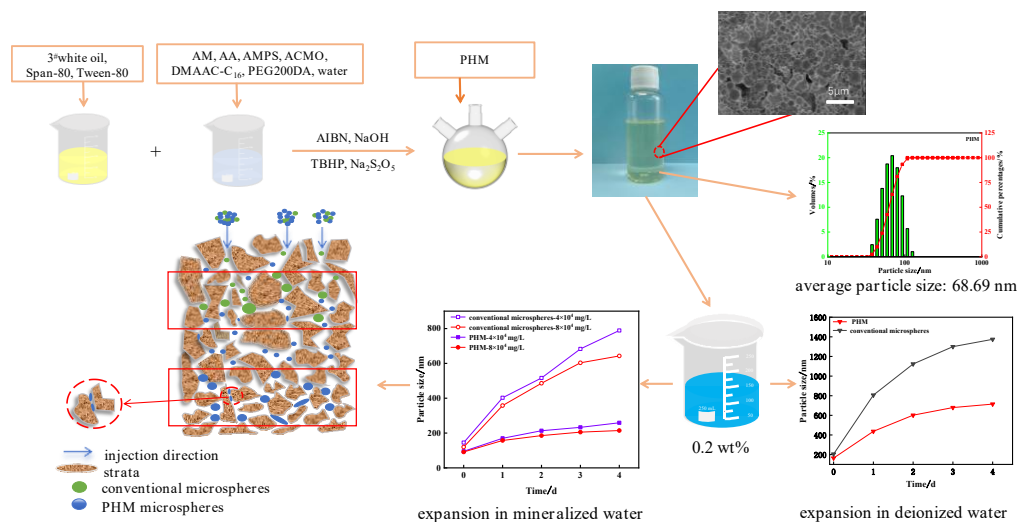

PHM microsphere initial particle size of 68.69nm, in 80°C (deionized water) in the expansion of 4 days, the expansion times for 4.34 times; 25°C (mineralized water) in the expansion of 4 days, the expansion times for 2.34 times, the blocking rate is greater than 85%.

**Keywords:** Nanomicrospheres; Slow expansion; Temperature resistance; Salt resistance; Plugging
